# Supplementary material for: Finite Element Analysis of a New Non-Engaging Abutment System for Three-Unit Implant-Supported Fixed Dental Prostheses
Source: MDPI journal article supplement (doi:10.3390/bioengineering9100483), 2022-09-20
Supplement: s1 [file s1]

Supplement Table S1. Peak von Mises stress and maximal principal stress

| Group | Loading | Peak von Mises stress    |                 |          |
|-------|---------|--------------------------|-----------------|----------|
|       |         | Fixture                  | Screw           | Abutment |
| AO    | Axial   | 176.122                  | 239.319         | 506.539  |
|       | 15°     | 180.422                  | 256.307         | 530.299  |
|       | 45°     | 194.145                  | 287.772         | 608.725  |
| BD    | Axial   | 363.056                  | 197.931         | 158.198  |
|       | 15°     | 373.138                  | 194.323         | 135.517  |
|       | 45°     | 472.376                  | 171.256         | 260.959  |
| Group | Loading | Maximal principal stress |                 |          |
|       |         | Cortical bone            | Cancellous bone | Crown    |
| AO    | Axial   | 43.278                   | 6.794           | 56.102   |
|       | 15°     | 50.864                   | 5.568           | 81.325   |
|       | 45°     | 28.698                   | 1.809           | 28.962   |
| BD    | Axial   | 20.263                   | 2.046           | 38.683   |
|       | 15°     | 17.235                   | 2.319           | 47.815   |
|       | 45°     | 17.628                   | 1.254           | 25.603   |

Supplement Table S2. Result data by nodes

| Group | Loading |     | Abutment |       | Fixture |       | Cancellous |       | Cortical |        |
|-------|---------|-----|----------|-------|---------|-------|------------|-------|----------|--------|
|       |         |     | 2nd M    | 2nd P | 2nd M   | 2nd P | 2nd M      | 2nd P | 2nd M    | 2nd P  |
| AO    | Axial   | AVG | 21.95    | 21.23 | 22.43   | 24.18 | 12.15      | 12.23 | 113.30   | 133.57 |
|       |         | SEM | 0.212    | 0.152 | 0.189   | 0.183 | 0.216      | 0.228 | 3.582    | 3.411  |
|       | 15°     | AVG | 21.48    | 23.31 | 22.60   | 23.46 | 13.19      | 11.40 | 125.69   | 130.79 |
|       |         | SEM | 0.199    | 0.245 | 0.228   | 0.287 | 0.236      | 0.206 | 4.264    | 3.201  |
|       | 45°     | AVG | 27.55    | 29.03 | 21.53   | 20.30 | 9.09       | 8.59  | 129.64   | 104.53 |
|       |         | SEM | 0.309    | 0.335 | 0.375   | 0.372 | 0.130      | 0.103 | 3.477    | 2.276  |
| BD    | Axial   | AVG | 33.52    | 37.10 | 20.15   | 20.19 | 9.78       | 9.87  | 86.59    | 123.82 |
|       |         | SEM | 0.779    | 0.805 | 0.431   | 0.456 | 0.192      | 0.194 | 3.276    | 5.889  |
|       | 15°     | AVG | 28.94    | 30.61 | 19.33   | 18.10 | 10.52      | 8.83  | 90.90    | 114.37 |
|       |         | SEM | 0.708    | 0.706 | 0.421   | 0.441 | 0.206      | 0.167 | 3.880    | 5.265  |
|       | 45°     | AVG | 43.96    | 50.01 | 32.38   | 29.21 | 9.57       | 8.56  | 123.24   | 104.23 |
|       |         | SEM | 1.738    | 1.884 | 0.994   | 1.009 | 0.142      | 0.120 | 4.234    | 3.807  |

AVG: average, SEM: standard error of the mean, M: molar, P: premolar.
